# Supplementary material
Source: PubMed Central journal article supplement (PMC8991348)
Supplement: tpmd211084.SD1.pdf [file tpmd211084.SD1.pdf]

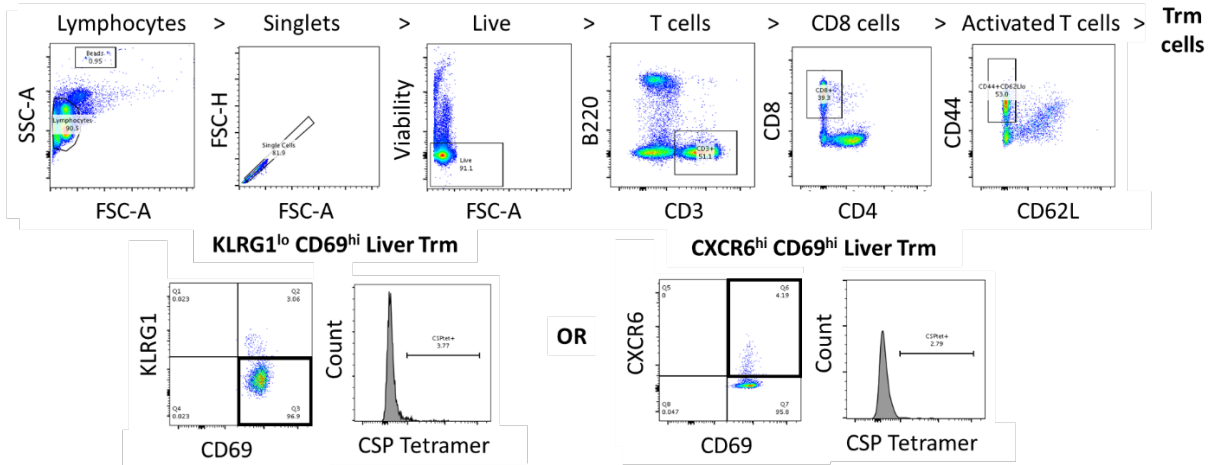

**Supplemental Figure 1.** Representative gating strategy and identification of PyCSP-specific Trm cells in the liver of a prime-and-trap vaccinated animal. Cells were gated for CD8<sup>+</sup> T cells (CD3e<sup>+</sup>, B220<sup>-</sup>, CD4<sup>+</sup>), CD44<sup>hi</sup> by CD62L<sup>lo</sup>, then assessed by either KLRG1<sup>lo</sup> by CD69<sup>hi</sup> or by CXCR6<sup>hi</sup> by CD69<sup>hi</sup>. Antigen specificity was then assessed by PyCSP-tetramer (SYVPSAEQI-specific H2-K<sup>d</sup> tetramer). Cell count per gram of tissue was calculated based on a known concentration of counting beads per samples to normalize data.

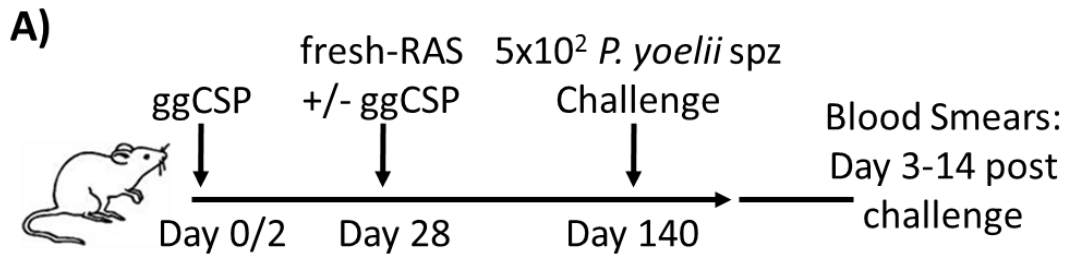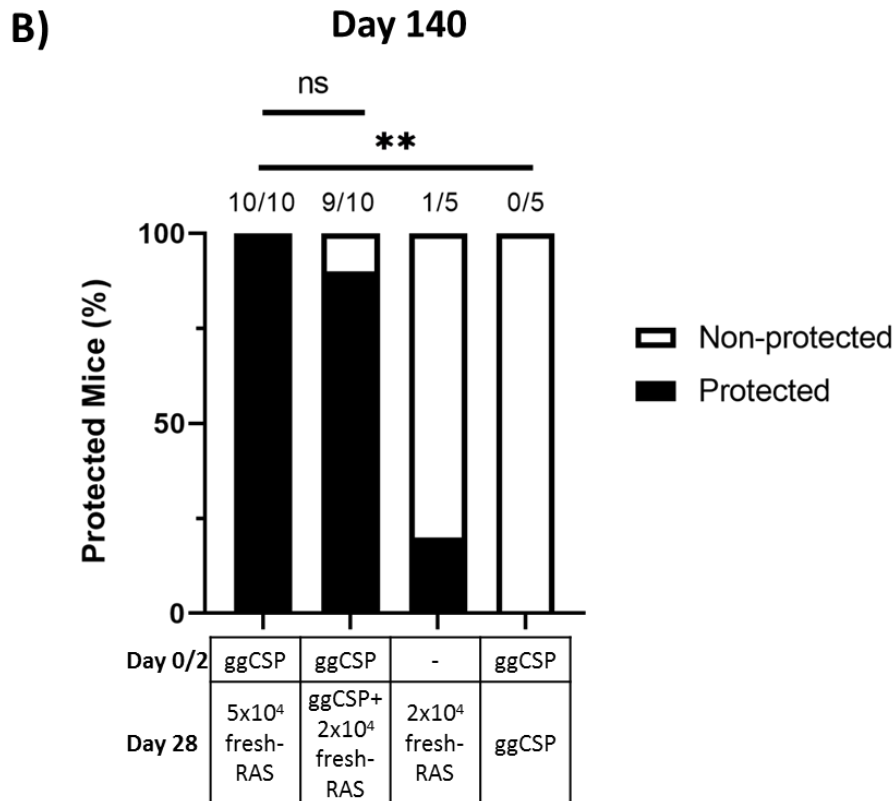

**Supplemental Figure 2.** DNA priming followed by fresh-RAS trap protects mice from spz challenge at four months: **(A)** Experimental design of prime-and-trap studies. **(B)** Results of protection studies after challenge with 500 wild-type purified *P. yoelii* spz administered four months after trapping. n=5-10 mice from one experiment. Fractions above bars indicate number of animals protected out of total group size. Protection was assessed with thin blood smears on Days 3-14 post challenge. Fisher Exact Test: fresh-RAS vs. all other groups. ns=p>0.05.  $p < 0.001$ .

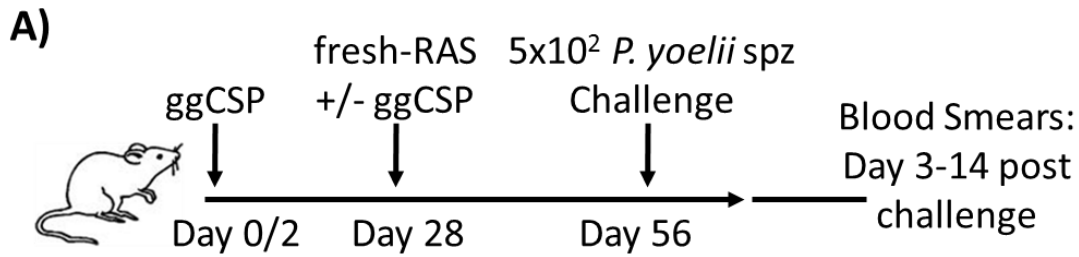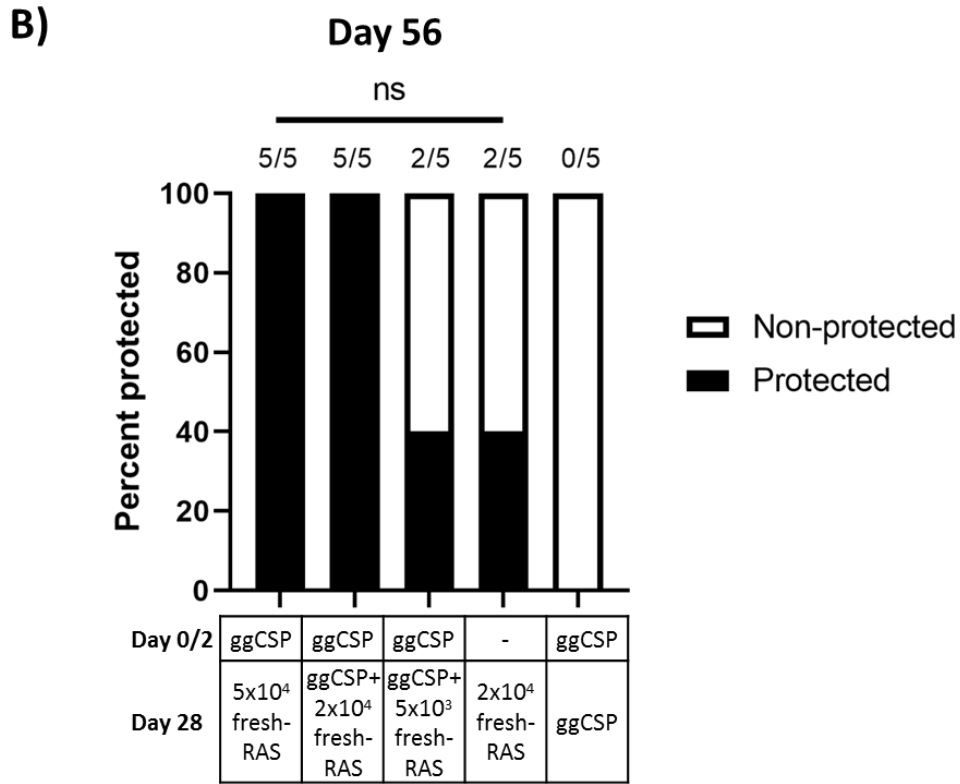

**Supplemental Figure 3.** Dose-dependent protection of prime-and- fresh-RAS trap vaccination: **(A)** Experimental design of prime-and-trap studies. **(B)** Results of protection studies after challenge with 500 wild-type purified *P. yoelii* spz administered four weeks after trapping. n=5 mice from one experiment. Fractions above bars indicate number of animals protected out of total group size. Protection was assessed with thin blood smears on Days 3-14 post challenge. Fisher Exact Test: fresh-RAS vs all other groups. ns= $p > 0.05$ . □

| Specificity                   | Clone    | Fluorochrome     | Vendor            | Catalog     |
|-------------------------------|----------|------------------|-------------------|-------------|
| CD3e                          | 145-2C11 | BUV 395          | BD                | 563565      |
| B220                          | RA3-6B2  | BV711            | BioLegend         | 103255      |
| CD4                           | GK1.5    | Alexa Fluor 700  | BioLegend         | 100429      |
| CD8a                          | 53-6.7   | BV421            | BD                | 563898      |
| CD69                          | H1.2F3   | BV510            | BD                | 563030      |
| CD44                          | IM7      | Alexa Fluor 488  | BioLegend         | 103015      |
| CD62L                         | MEL-14   | PE-Cy7           | BD                | 560516      |
| KLRG1                         | 2F1      | PerCP-Cy5.5      | BioLegend         | 138418      |
| CXCR6                         | 221002   | PE               | Fisher Scientific | FAB2145P100 |
| CSP-tetramer                  | -        | APC              | NIH               | -           |
| APC                           | -        | Streptavidin-APC | Prozyme           | PJ27S       |
| Zombie NIR™ Fixable Viability | -        | NIR              | BioLegend         | 423105      |
| Fc CD16/32                    | 2.4G2    | -                | BD                | 553141      |
| Counting Beads                | -        | -                | Polyscience       | 18328-5     |

**Supplemental Table 1:** Flow cytometry reagents and antibodies that were used to assess liver resident memory cells.
